# Supplementary material for: Structural basis of GTPase-mediated mitochondrial ribosome biogenesis and recycling
Source: PubMed Central journal article supplement (PMC8209004; doi:10.1038/s41467-021-23702-y), 2021-06-16
Supplement: 41467_2021_23702_MOESM6_ESM.pdf [file 41467_2021_23702_MOESM6_ESM.pdf]

## Reporting Summary

Nature Research wishes to improve the reproducibility of the work that we publish. This form provides structure for consistency and transparency in reporting. For further information on Nature Research policies, see our [Editorial Policies](#) and the [Editorial Policy Checklist](#).

### Statistics

For all statistical analyses, confirm that the following items are present in the figure legend, table legend, main text, or Methods section.

n/a Confirmed

- The exact sample size ( $n$ ) for each experimental group/condition, given as a discrete number and unit of measurement
- A statement on whether measurements were taken from distinct samples or whether the same sample was measured repeatedly
- The statistical test(s) used AND whether they are one- or two-sided  
*Only common tests should be described solely by name; describe more complex techniques in the Methods section.*
- A description of all covariates tested
- A description of any assumptions or corrections, such as tests of normality and adjustment for multiple comparisons
- A full description of the statistical parameters including central tendency (e.g. means) or other basic estimates (e.g. regression coefficient) AND variation (e.g. standard deviation) or associated estimates of uncertainty (e.g. confidence intervals)
- For null hypothesis testing, the test statistic (e.g.  $F$ ,  $t$ ,  $r$ ) with confidence intervals, effect sizes, degrees of freedom and  $P$  value noted  
*Give  $P$  values as exact values whenever suitable.*
- For Bayesian analysis, information on the choice of priors and Markov chain Monte Carlo settings
- For hierarchical and complex designs, identification of the appropriate level for tests and full reporting of outcomes
- Estimates of effect sizes (e.g. Cohen's  $d$ , Pearson's  $r$ ), indicating how they were calculated

*Our web collection on [statistics for biologists](#) contains articles on many of the points above.*

### Software and code

Policy information about [availability of computer code](#)

Data collection Serial EM 3.8 beta 8

Data analysis RELION 3.0 beta-2, UCSF Chimera 1.13, UCSF ChimeraX v1.2, COOT 0.9.5, Warp v1.0.7, PHENIX 1.18, MaxQuant 1.6.0.1

For manuscripts utilizing custom algorithms or software that are central to the research but not yet described in published literature, software must be made available to editors and reviewers. We strongly encourage code deposition in a community repository (e.g. GitHub). See the Nature Research [guidelines for submitting code & software](#) for further information.

### Data

Policy information about [availability of data](#)

All manuscripts must include a [data availability statement](#). This statement should provide the following information, where applicable:

- Accession codes, unique identifiers, or web links for publicly available datasets
- A list of figures that have associated raw data
- A description of any restrictions on data availability

The electron density reconstructions and structure coordinates were deposited with the Electron Microscopy Database (EMDB) under accession codes EMD-12865, EMD-12872, EMD-12867, EMD-12868, EMD-12870, EMD-12869, EMD-12871 and with the Protein Data Bank (PDB) under accession codes 7OF0, 7OF7, 7OF2, 7OF3, 7OF5, 7OF4, 7OF6.

The mass spectrometry proteomics data have been deposited to the ProteomeXchange Consortium via the PRIDE (Perez-Riverol et al., 2018) partner repository with the dataset identifier PXD023502. Project Name: GTPase driven maturation of the human mitoribosomal peptidyl transferase center; Project accession: PXD023502.

## Field-specific reporting

Please select the one below that is the best fit for your research. If you are not sure, read the appropriate sections before making your selection.

Life sciences       Behavioural & social sciences       Ecological, evolutionary & environmental sciences

For a reference copy of the document with all sections, see [nature.com/documents/nr-reporting-summary-flat.pdf](https://www.nature.com/documents/nr-reporting-summary-flat.pdf)

## Life sciences study design

All studies must disclose on these points even when the disclosure is negative.

|                 |                                                                                                                                    |
|-----------------|------------------------------------------------------------------------------------------------------------------------------------|
| Sample size     | No statistical methods were used to predetermine sample size. All biochemical experiments were replicated two or more times.       |
| Data exclusions | No data were excluded from the analyses.                                                                                           |
| Replication     | All attempts at replication were successful.                                                                                       |
| Randomization   | Samples were not allocated to groups.                                                                                              |
| Blinding        | Investigators were not blinded during data acquisition and analysis because it is not a common procedure for the methods employed. |

## Reporting for specific materials, systems and methods

We require information from authors about some types of materials, experimental systems and methods used in many studies. Here, indicate whether each material, system or method listed is relevant to your study. If you are not sure if a list item applies to your research, read the appropriate section before selecting a response.

### Materials & experimental systems

### Methods

| n/a                                 | Involved in the study                                     | n/a                                 | Involved in the study                           |
|-------------------------------------|-----------------------------------------------------------|-------------------------------------|-------------------------------------------------|
| <input type="checkbox"/>            | <input checked="" type="checkbox"/> Antibodies            | <input checked="" type="checkbox"/> | <input type="checkbox"/> ChIP-seq               |
| <input type="checkbox"/>            | <input checked="" type="checkbox"/> Eukaryotic cell lines | <input checked="" type="checkbox"/> | <input type="checkbox"/> Flow cytometry         |
| <input checked="" type="checkbox"/> | <input type="checkbox"/> Palaeontology and archaeology    | <input checked="" type="checkbox"/> | <input type="checkbox"/> MRI-based neuroimaging |
| <input checked="" type="checkbox"/> | <input type="checkbox"/> Animals and other organisms      |                                     |                                                 |
| <input checked="" type="checkbox"/> | <input type="checkbox"/> Human research participants      |                                     |                                                 |
| <input checked="" type="checkbox"/> | <input type="checkbox"/> Clinical data                    |                                     |                                                 |
| <input checked="" type="checkbox"/> | <input type="checkbox"/> Dual use research of concern     |                                     |                                                 |

## Antibodies

|                 |                                                                                                                                                                                                                                                                                                                                                                                                                                                                                                                                                                                                                                                                                                                                                                                                                                                             |
|-----------------|-------------------------------------------------------------------------------------------------------------------------------------------------------------------------------------------------------------------------------------------------------------------------------------------------------------------------------------------------------------------------------------------------------------------------------------------------------------------------------------------------------------------------------------------------------------------------------------------------------------------------------------------------------------------------------------------------------------------------------------------------------------------------------------------------------------------------------------------------------------|
| Antibodies used | Primary polyclonal anti-rabbit antibodies used in this study (dilution is indicated in brackets): anti-NSUN4 [1:1000] (Lavdovskaia et al., 2020; ProteinTech; #16320-1-AP), anti-MTERF4 [1:1000] (Lavdovskaia et al., 2020; Sigma Prestige; #HPAO27097; RRID:AB_10603879), anti-MALSU1 [1:1000] (Lavdovskaia et al., 2018; Proteintech; #22838-1-AP; RRID:AB_11182483), anti-GTPBP5 [1:1000] (Sigma Prestige; #HPAO47379; RRID:AB_10965845), anti-GTPBP10 [1:1000] (Lavdovskaia et al., 2018; Novusbio; #NBP1-85055; RRID:AB_11037644), anti-bL32m [1:1000] (Lavdovskaia et al., 2018; gift from Prof. P. Rehling; PRAB4957), anti-uS14m [1:1000] (Proteintech; #16301-1-AP; RRID:AB_2878240). Primary monoclonal anti-mouse antibody used in this study (dilution is indicated in brackets): anti-uL3 [1:500] (Proteintech; #66130-1-IG; RRID:AB_2881529). |
| Validation      | Antibodies have been validated by ProteinTech (anti-uL3) and in recent studies: PMID: 30085210 (anti-GTPBP10, anti-MALSU1, anti-bL32m), PMID: 33264405 (anti-uS14m, anti-NSUN4, anti-MTERF4, anti-GTPBP5) PMID: 32652011 (anti-MTERF4, anti-GTPBP5).                                                                                                                                                                                                                                                                                                                                                                                                                                                                                                                                                                                                        |

## Eukaryotic cell lines

Policy information about [cell lines](#)

|                          |                                                                                                                                                                                                                                        |
|--------------------------|----------------------------------------------------------------------------------------------------------------------------------------------------------------------------------------------------------------------------------------|
| Cell line source(s)      | HEK293-Flp-In T-Rex - wild type (ThermoFisher Scientific, #R78007), HEK293-Flp-In T-Rex - Gtpbp6-/- (Generated by Elena Lavdovskaia, Research group Richter-Dennerlein, University Medical Center Göttingen; Lavdovskaia et al., 2020) |
| Authentication           | HEK293-Flp-In T-Rex - wild type cell line was not authenticated. CRISPR/Cas9 mediated knockout of GTPBP6 was confirmed by sequencing (Lavdovskaia et al., 2020).                                                                       |
| Mycoplasma contamination | Cells were systematically confirmed to be negative for the presence of Mycoplasma by GATC Biotech.                                                                                                                                     |

Commonly misidentified lines  
(See [ICLAC](#) register)

No commonly misidentified cell lines were used.
